# Supplementary material for: Histone H3 Lysine 9 Acetylation is Downregulated in GDM Placentas and Calcitriol Supplementation Enhanced This Effect
Source: MDPI journal article supplement (doi:10.3390/ijms19124061), 2018-12-14
Supplement: s1 [file s1]

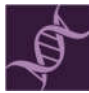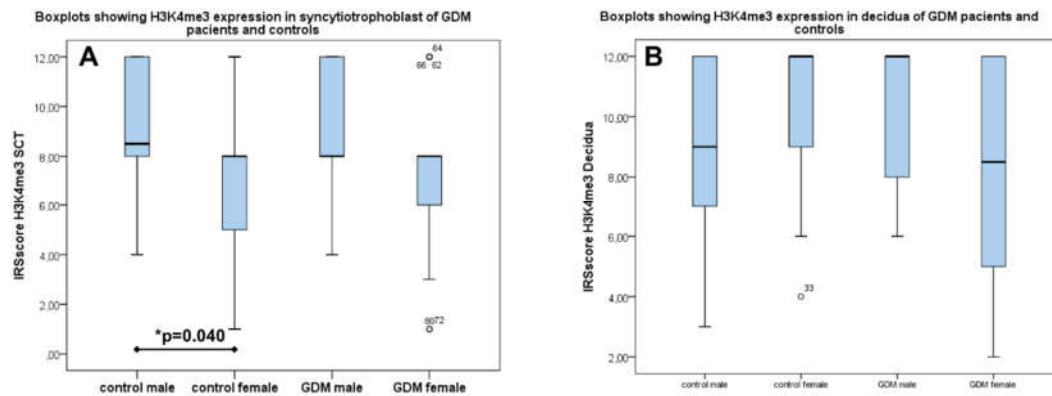

**Figure S1.** Sex-disaggregated H3K4me3 expression in syncytiotrophoblast (**A**) and decidua (**B**) of control and GDM placentas. Boxplots of the IRS show no significant differences in H3K4me3 expression. The syncytiotrophoblast of female control placentas displays a significantly lower ( $p = 0.040$ ) H3K4me3 expression compared to male control placentas. The bars indicate the 5th and 95th percentiles. Circles indicate values more than 1.5-times the boxes' lengths.
